# Supplementary figures and images for: Electron tomography of negatively stained complex viruses: application in their diagnosis
Source: Springer Nature journal article supplement (doi:10.1186/1746-1596-4-5), 2009-01-01

**A**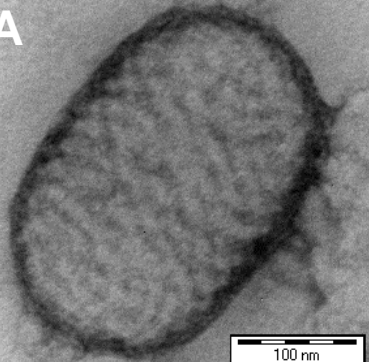**B**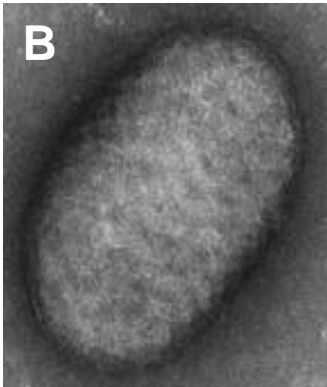**C**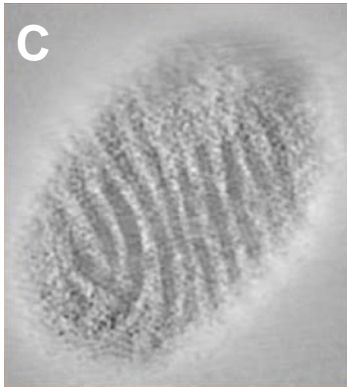

Supplement: 13000_2009_203_MOESM5_ESM.pdf [file 13000_2009_203_MOESM5_ESM.pdf]

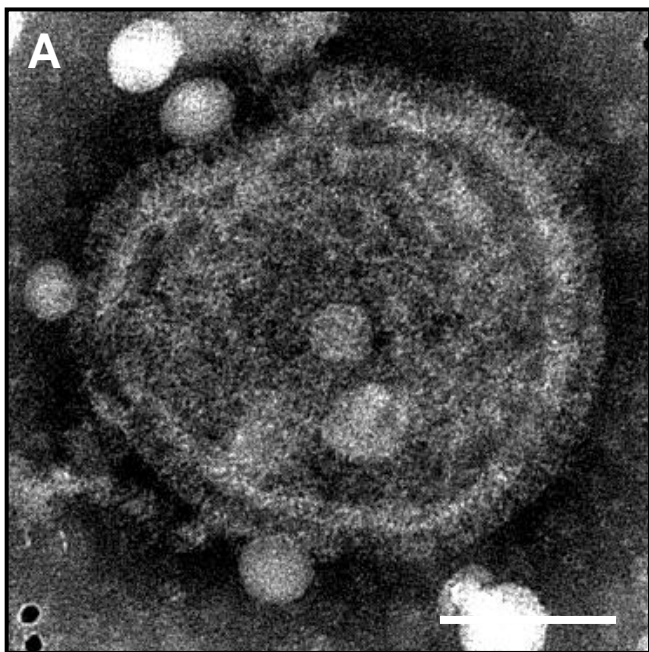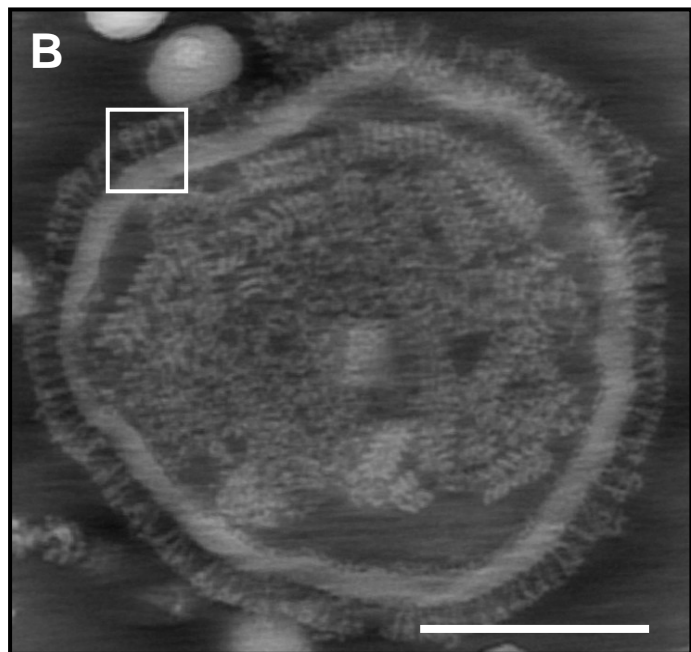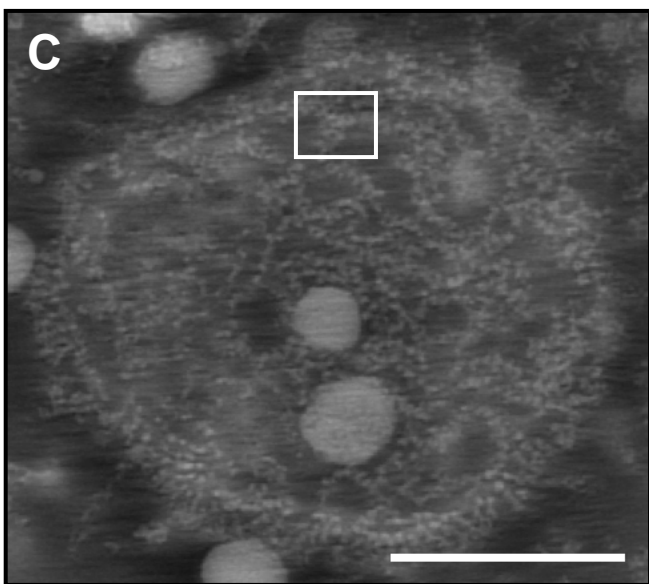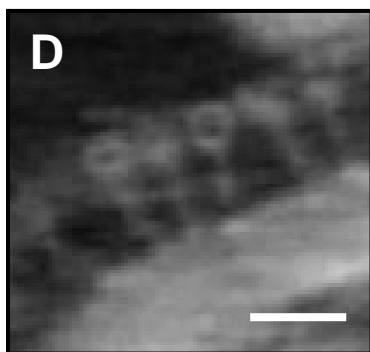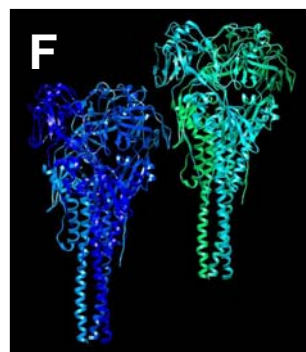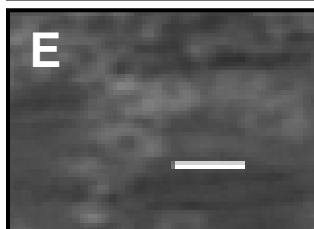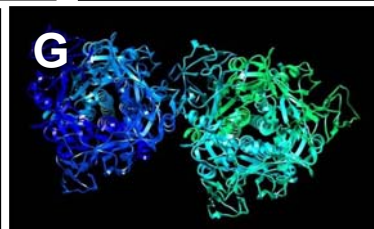

Supplement: 13000_2009_203_MOESM6_ESM.pdf [file 13000_2009_203_MOESM6_ESM.pdf]

**A**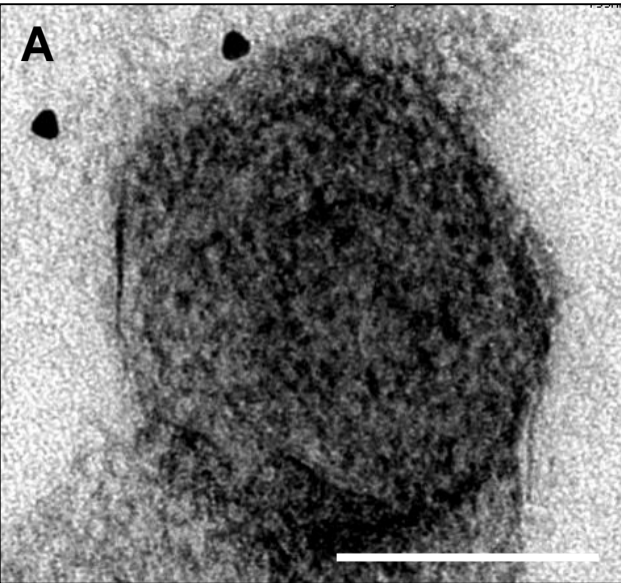**B**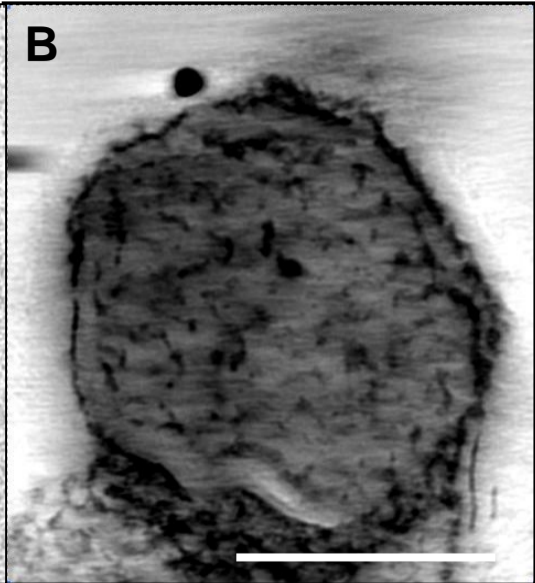

Supplement: 13000_2009_203_MOESM7_ESM.pdf [file 13000_2009_203_MOESM7_ESM.pdf]
